1 SHORT NOTES:

2

3 Filling gaps: fishing, genetics, and conservation of groupers, especially the comb  
4 grouper (badejo) (*Mycteroperca acutirostris*), in SE Brazil  
5 (2013-2020)

6 Short title

7 Fishing, genetics and conservation of groupers in Brazil

8

9 Alpina Begossi\*<sup>1,2,3</sup>, Svetlana Salivonchyk<sup>1,4</sup>, Branko Glamuzina<sup>1,5</sup>, Alessandro Alves-Pereira<sup>6</sup>,  
10 Carlos Eduardo De Araújo Batista<sup>7</sup>, Regina H. G. Priolli<sup>1,2</sup>

11

12 <sup>1</sup> Fisheries and Food Institute (FIFO), Rio de Janeiro, Brazil ([www.fisheriesandfood.com](http://www.fisheriesandfood.com))

13 <sup>2</sup> Núcleo de Estudos e Pesquisas em Alimentação (NEPA), Universidade Estadual de  
14 Campinas, Campinas (UNICAMP), SP, Brazil

15 <sup>3</sup> Graduate Program in Environmental Sciences/Sustainability, Unisantia, Santos, Brazil

16 <sup>4</sup> Institute for Nature Management, National Academy of Sciences of Belarus, Minsk, Belarus

17 <sup>5</sup> Department for Applied Ecology, University of Dubrovnik, Dubrovnik, Croatia

18 <sup>6</sup> Departamento de Biologia Vegetal, Instituto de Biologia, Universidade Estadual de Campinas  
19 (UNICAMP), Campinas, SP, Brazil

20 <sup>7</sup> Departamento de Genética, ESALQ, Universidade de São Paulo (USP), SP, Brazil

21

22 \* Corresponding author

23

## 24 **Abstract**

25           There are large gaps in our knowledge of the biology of important fish consumed by  
26 people in tropical countries, which makes conservation difficult. Small-scale fisheries are  
27 difficult to study and regulate, especially in countries with no systematic species monitoring. It is  
28 even more difficult to estimate the influence of these fisheries on vulnerable fish species and to  
29 diagnose possible damage to local fish populations. In this study, 490 individuals of **badejo**, or  
30 comb grouper (*Mycteroperca acutirostris*), were observed at the Posto 6 fishery in Copacabana,  
31 Rio de Janeiro, for the periods of 2013-2014 and 2018-2020. A pattern of decreasing catches was  
32 observed for comb grouper. Therefore, provided that the fishing gear and the number of fish  
33 have remained the same, the apparent decrease in comb grouper needs to be further investigated.  
34 The results provide information regarding the reproduction of comb grouper, with major  
35 spawning season around spring (September-December) and additional spawning during April in  
36 SE Brazil. Samples from 96 groupers along the coast of Brazil were obtained, and genetic  
37 analyses were conducted. The genetic information obtained for grouper species enabled us to  
38 determine the relative genetic proximity of *M. acutirostris* and *Mycteroperca bonaci* and to  
39 obtain information that can be useful for aquaculture and conservation.

40

41

## 42 **Introduction**

43           Small-scale fisheries (SSFs) are ubiquitous along maritime coasts. Despite a significant  
44 lack of systematic data, such fisheries are a valuable food source for local populations and are an  
45 important source of income [1,2]. Small-scale fisheries account for approximately 50% all fish  
46 captured for consumption worldwide; however, the lack of long-term monitoring in data-poor  
47 countries contributes to failures in fishery management [3].

48           Estimation of grouper populations and their distributions in coastal aquatic ecosystems is  
49 complex, as exemplified in a study on dusky grouper [4]. Of course, even small-scale fisheries  
50 can impact aquatic fauna when considering late-maturing species and the reality that  
51 environmental problems are often not considered to be of primary importance by local  
52 authorities, as is the case in Brazil [5]. On the other hand, it is known that SSFs can generally be  
53 sustainable even in developing countries (see examples of Caribbean and Latin American SSFs,  
54 such as those given by Salas et al. [6]). Therefore, the question is how are endangered, slowly  
55 growing species affected?

56

### 57 **The genus *Mycteroperca* and the comb grouper (*Mycteroperca acutirostris*)**

58           In this group are the ‘badejo’, as they are called in Brazil. Their dorsal fins have 11  
59 spines and 15-18 rays. They are coastal fish, have high commercial value, and are considered to  
60 be “noble fish”. Groupers are part of the Epinephelinae subfamily. Nevertheless, there is debate

61 based on genetic data regarding whether the subfamily Epinephelinae should be treated as a  
62 family (Epinephelidae) and not a subfamily [7].

63 *Mycteroperca acutirostris* has a dark brown color and a head with long striations, and it  
64 is characterized by 11 dorsal spines and 15-17 rays and 50-56 rakers in the first branchial arch,  
65 along with a rounded caudal fin. It is associated with rocky bottoms (adults), and juveniles are  
66 found in shallow waters and mangrove areas; its major threat is fishing pressure [7,8]. Our  
67 studies have shown that this species spawns in the spring in Brazil [9,10].

68 Other species are addressed here, specifically in the genetic study, including  
69 *Mycteroperca bonaci*, called the black grouper, which has a dark brown color and regular,  
70 hexagonal spots; it has, among other traits, truncated caudal fins and 11-16 gill rakers in the  
71 first branchial arch. It is a reef species, but juveniles can be found in estuarine environments  
72 [7,8]. Another species included in the genetic study is *Mycteroperca interstitialis*, called the  
73 yellowmouth grouper, which has small brown spots, 11 dorsal fins, 16-18 rays, a first branchial  
74 arch with 15-19 gill rakers, and an emarginate caudal fin. It is also a reef species. We  
75 considered other species for the genetic study, especially because they are found in the coast of  
76 Brazil: *M. acutirostris* is common in the SE whereas *M. bonaci* is common in NE Brazil. *M.*  
77 *interstitialis* is found in both regions, among others.

78 These species are monandric hermaphrodites, and *M. bonaci* forms spawning  
79 aggregations. Fishing pressure is one of the main threats to these species; adults occupy reef

80 habitats, and juveniles are found in estuarine and mangrove environments. Adults feed on fish  
81 [7].

## 82 **The lack of data**

83

84 When searching in FishBase [11] and the IUCN Red List (data from 2016 for these fish)  
85 for *Mycteroperca acutirostris* (comb grouper), we found that the knowledge about this species  
86 had several gaps. There are gaps for *M. acutirostris*, which include important information, such  
87 as diet and reproduction. The available information is general (and is based on few studies) such  
88 as the following: It has high vulnerability and high prices; there is no information regarding eggs,  
89 spawning processes, or periods; and food items are mentioned as “unidentified invertebrates”  
90 (Froese and Pauly [11]: February 17, 2021: 14:35). Nevertheless, it is considered to be a species  
91 of LC (least concern), and its population is estimated as stable (UICN [12]: last assessed  
92 November 20, 2016). For *Mycteroperca bonaci*, for example, we found slightly more biological  
93 information (Froese and Pauly[11]: February 18, 2021: 11:38): spawning in Brazil (one study  
94 including other fish species) in the period of June-December occurs for *M. bonaci* [13], and its  
95 diet was unidentified. *M. bonaci* is considered to be NT (near threatened, population decreasing)  
96 (IUCN [14]: February 18: 11:42). For *Mycteroperca interstitialis* (yellowmouth grouper), we  
97 found some information regarding reproduction (a study in the United States) showing that its  
98 reproduction occurs in all months of the year and its diet consists of “nekton” (a study in Puerto

99 Rico) (Froese and Pauly [11]: February 18: 11:52). It is considered to be VU (vulnerable), and its  
100 population is decreasing (IUCN [14]: February 18: 11:55).

101 It is important to mention here that even though we included some genetic data for other  
102 species of *Mycteroperca* in this study, which allows us to make comparisons, our main focus will  
103 be *M. acutirostris* because we have been following its catches for two periods since 2013 in  
104 Copacabana, Rio de Janeiro (State of Rio de Janeiro), with some scattered observations for  
105 Bertioga and Santos (State of São Paulo).

106 The objective of this study was to obtain data about the fishing activity and biology of the  
107 comb grouper. Given the substantial gaps in knowledge about an important food species and for  
108 the market, we believe that original and previously unpublished data regarding *M. acutirostris*  
109 are important for conserving this species.

110

### 111 **Our earlier studies**

112 This study follows a series of studies on small-scale fishing for groupers, especially  
113 *Epinephelus marginatus* (dusky grouper) and *Mycteroperca acutirostris* (comb grouper), that  
114 began in 2006 for both the dusky grouper [15] and comb grouper [10] at the Colônia de  
115 Pescadores do Posto 6 in Copacabana, Rio de Janeiro, Brazil.

116

### 117 **Studies of other Epinephelinae: *Epinephelus marginatus*, dusky grouper**

118 *Epinephelus marginatus* is found in the Atlantic and in the western Indian Ocean with a  
119 decreasing population trend and is considered by the IUCN to be “EN” (endangered);  
120 *Mycteroperca acutirostris* is found in the western Atlantic and is considered to be heavily fished,  
121 but it is viewed by the IUCN to be of “LC” (least concern) [7,11].

122 Here, we chronologically describe the research results for groupa, dusky grouper. The  
123 most recent study [16] showed relative catches and price stability. The studies that were begun  
124 by Begossi and Silvano [15] included results about the local knowledge of fishers regarding diet  
125 and habitat, fishing locations, weight and length (TL), and stomach contents, among other  
126 features (sample of 40 individuals from 2006-2007). This study was followed by that of  
127 Begossi et al. [17], which included fishing locations (fishing spots), weight and length (TL),  
128 macroscopic analysis of gonads by trained fishers (800 individuals from 2013 to 2015); Begossi  
129 et al. [18]: locations, weight and length (TL), macroscopic analysis of gonads by trained fishers  
130 (sample of 222 individuals, from 2016-2017), and prices from October, 2016 to November,  
131 2017; and work by Begossi and Salivonchyk [16]: 1,896 groupers from 2013-2018, with catches  
132 and prices being relatively stable in Copacabana  
133 (the <https://www.biorxiv.org/content/10.1101/759357v1>).

134

## 135 **Methods**

136

### 137 **The fishery**



138           The “Colônia de Pescadores do Posto 6” includes a small-scale fishing community on  
139 Copacabana Beach that was established in 1923. Fishing is conducted from small motorboats by  
140 using set gillnets, hooks and lines and by spearfishing [18,19]. Recently, spearfishing by diving  
141 has become important, especially among young fishers. Fishing effort has been similar over the  
142 last 11 years: there are approximately 20-25 active fishers, including approximately 10 divers  
143 who spearfish close to islands.

144           Fieldwork at Copacabana was undertaken from September 2013 to February 2020 at the  
145 landing point or fish market of Posto 6, Copacabana. One of the authors (AB) performed visits  
146 on approximately 5 days/month and compiled information on weights, prices, and locations,  
147 among other data. Two fishers were trained by following a protocol that is explained in detail in  
148 Begossi [20] and was used in Begossi et al. [17,18,21]. These methods included local  
149 knowledge, tracking fishery landings (systematic visits 3-5 days/month), including fishing  
150 locations, weight and length measurements (TL), and reproduction (gonad macroscopic  
151 analysis), which were the same as in the earlier studies [detailed in 18,20]. Garoupa, or dusky  
152 grouper (*E. marginatus*), was observed in 2013-2018, and comb grouper (*M. acutirostris*), was  
153 observed in two periods, namely, 2013-2014 and 2018-2020.

154

## 155 **Genetics of groupers**

156           **Sampling of fins for genetic analyses.** A total of 96 samples were obtained along the  
157 coast of Brazil (see details in [18]) from specimens belonging to two genera (*Epinephelus* and

158 *Mycteroperca*) and five grouper species: *E. marginatus* (N = 28), *E. morio* (N = 19), *M.*  
159 *acutirostris* (N = 16), *M. bonaci* (N = 27), and *M. interstitialis* (N = 6). All individuals were  
160 caught by commercial fishers and identified based on their morphological characteristics as  
161 described in Begossi et al. [18].

162 **Molecular techniques.** Total genomic DNA was extracted from approximately 20 mg of  
163 tissue using a DNeasy Blood and Tissue Kit (Qiagen, Hilden, GE). DNA concentrations were  
164 estimated using a Qubit v4.0 fluorometer (Thermo Fisher Scientific, Waltham, USA). Thermo  
165 Fisher Scientific) and were normalized to 20 ng/ $\mu$ l. Genomic libraries were constructed  
166 according to the Genotype-by-Sequencing double digestion protocol described by Poland et al.  
167 [22], using the restriction enzymes NsiI (NEB, Ipswich, USA) and MseI (NEB). The resulting  
168 libraries were pooled at 96-plex and sequenced on the Illumina NextSeq 500 sequencing  
169 platform (Illumina, Inc, USA) at the Hemocentro of Ribeirão Preto facilities (Brazil), in mid-  
170 output mode and set to produce 150 bp single-end reads. The quality of the obtained raw reads  
171 was assessed using FastQC software  
172 (<http://www.bioinformatics.babraham.ac.uk/projects/fastqc/>) at the Hemocentro of Ribeirão  
173 Preto facilities (Brazil).

174 For each genus, samples were demultiplexed, and the raw read sequences were filtered  
175 with the module “process\_radtags” in the Stacks program (version 1.42) [23]. SNP calling  
176 retained only SNP per sequenced tag, with a minimum sequencing depth of 5X, frequency of the  
177 least common allele  $\geq 0.05$  and occurring in at least 90% of individuals within each species. The

178 SNP identification was performed considering each genus separately, and also for the five  
179 species simultaneously. Population genomic analyses were performed by applying additional  
180 filtering parameters to obtain the maximum-quality SNPs: 1) individual samples with >55%  
181 missing data were excluded, and 2) SNPs with missing data in 25% of the samples or a minor  
182 allele frequency (MAF) <0.05 were removed.

183

184 **Population genetic analyses.** The filtered data were imported as a `genind` object into R  
185 and were analyzed mainly by using several packages for population genetics. An outlier locus  
186 approach was taken using the R packages `PCAdapt` version 3.0.4 [24] and `fsthet` [25] and the  
187 software package `SelEstim` [26], and only the data that were identified as outliers by at least two  
188 of the three methods were considered as candidates for selection. The number of groups  
189 considered in `fsthet` and `SelEstim` analyses were three for *Mycteroperca* two for *Epinephelus*  
190 (corresponding to the number of species of each collection sampled). The outputs from these  
191 analyses were used to create a neutral locus dataset and an adaptive locus dataset for further  
192 analysis. Neighbor-joining trees were generated for both the neutral and outlier datasets using  
193 Nei's genetic distance method. Analyses of population structure were performed using  
194 discriminant analysis of principal components (DAPC) with the 'Adegenet' package [27].

195

## 196 **Results**

197

198 **The fishery at Posto 6, Copacabana**

199           The main fishing locations of the studied individuals of dusky grouper and comb grouper  
200 caught in 2013-2014 and 2018-2020 were the area in 2-7 km south from Copacabana beach,  
201 where a lot of archipelagos and islands are located: Cagarras Islands, Tijucas Islands, Redonda  
202 Islands, Rasa Island and others (Fig. 1).

203

204 **Fig 1. Fishing Locations Used for dusky grouper and comb grouper (2013-2018).**

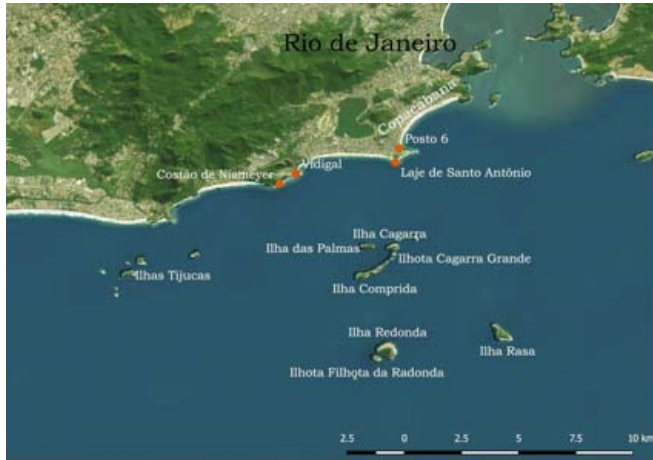

205

206           The number of individuals and the weights of comb grouper found and studied at the  
207 landing point and fish market in Posto 6, Copacabana significantly varied by year and month of  
208 the year (Tables 1 and 2).

209           We observed a total of 490 individuals, among which weights were obtained for 466  
210 individuals and showed a total catch of 630.39 kg. The average catch was 1.36 kg. While 410,55  
211 kg was obtained in 2014, we observed a relative decrease in comb grouper catches, with 2019

212 being the year in which the species became rare in Copacabana fishing catches, and this trend  
 213 continued in 2020.

214 **Table 1.** Comb groupers observed at Copacabana fishery from 2013 to 2021. The data in  
 215 parentheses indicate the number of individuals for which the weight was determined, when it  
 216 was not possible to weight the fish caught. Total number of individuals is 490 and weight  
 217 obtained for 464 individuals (\**covid* period). In the *covid* period of the study (May, 2020 to  
 218 March 2021), occasional visits were made, and two trained fishers contributed through  
 219 *whatsapp*, when possible. In this period of 27 days of observations (19 visits and 8 *whatsapp*  
 220 messages), 19 *M. acutirostris* were observed.

221

| Month | 2013 | 2014 | 2018    | 2019 | 2020    |
|-------|------|------|---------|------|---------|
| Jan   |      | 14   |         |      | 23 (3)  |
| Feb   |      | 32   | 1       |      | 10 (5)  |
| Mar   |      | 12   |         |      | 2       |
| Apr   |      | 26   | 3 (2)   |      | *       |
| May   |      | 116  |         |      | *       |
| Jun   |      | 28   |         |      | *       |
| Jul   |      | 46   | 13      |      | *       |
| Aug   |      | 20   | 29      |      | *       |
| Sep   | 6    |      | 17      |      | *       |
| Out   | 34   |      | 21      |      | *       |
| Nov   | 18   |      |         | 2    | *       |
| Dec   | 3    | 1    |         | 17   | *       |
| Total | 61   | 291  | 84 (83) | 19   | 35 (10) |

222

223

224 **Table 2.** Weight (kg) of comb grouper caught at  
 225 Copacabana fishery (2013-2020). Total weight is 630.39 (n=464 individuals)  
 226 and average catch is 1.36kg. For the *covid* period (March 2020-March 2021),  
 227 27 days, the weight amounted 42,4 Kg (n=19), average 2,23Kg per individual.

228

| Mon | 2013 | 2014   | 2017 | 2018  | 2019 | 2020 |
|-----|------|--------|------|-------|------|------|
| Jan |      | 13.01  |      |       |      | 6.90 |
| Feb |      | 58.75  | 8.78 | 1.30  |      | 4.20 |
| Mar |      | 10.51  |      |       |      | 2.50 |
| Apr |      | 40.25  |      | 1,05  |      |      |
| May |      | 178.05 |      |       |      |      |
| Jun |      | 23.16  |      |       |      |      |
| Jul |      | 67.60  |      | 24.77 |      |      |
| Aug |      | 17.20  |      | 55.89 |      |      |

|              |       |        |      |        |       |       |
|--------------|-------|--------|------|--------|-------|-------|
| <b>Sep</b>   | 5.17  |        |      | 34.70  |       |       |
| <b>Out</b>   | 35.98 |        |      | 22.68  |       |       |
| <b>Nov</b>   | 13.39 |        |      |        | 3     |       |
| <b>Dec</b>   | 11.30 | 2.00   |      |        | 33.41 |       |
| <b>Total</b> | 65.84 | 410.55 | 8.78 | 140.40 | 36.41 | 13.60 |

229 Mature gonads for comb grouper, were observed in April, September and October: these  
 230 spring months coincide with mature gonads being observed in dusky grouper [16,18,28] (Fig 2).  
 231 The months mentioned by fishers from Copacabana (13 fishers) as the months in which comb  
 232 grouper was “*ovado*” (with mature gonads) were September (5 fishers) and November-December  
 233 (8 fishers).

234 **Fig 2. For the Period 2013-2020, 392 Individuals of Comb Grouper were Examined for**  
 235 **Gonads.** Visible Gonads were Observed in Only 9 Cases were: 5 in September and 2 in April  
 236 and October.

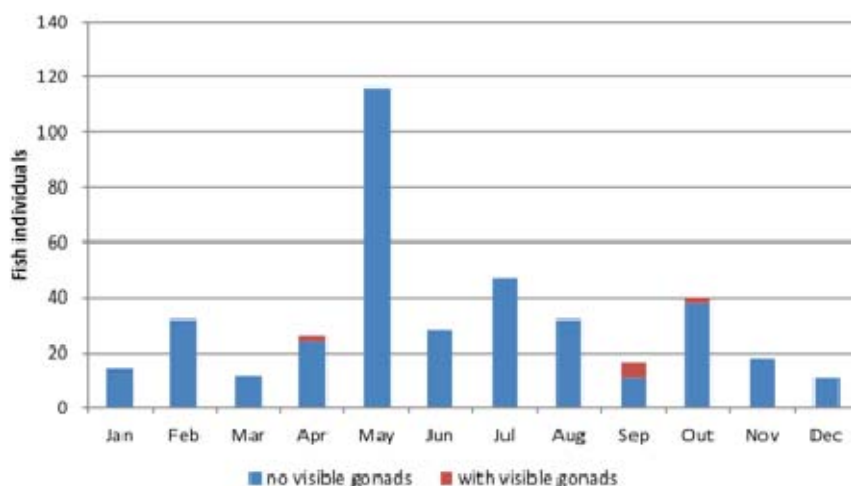

237  
 238 Prices were examined for April and July October of 2018. The average price of comb  
 239 grouper, was 40.8 Reais/kg. The prices ranged from 26.5 (26/07/2018) to 55.5 reais/kg  
 240 (10/10/2018). The average daily prices varied from 36 (11/04/2018) to 45.4 reais/kg

241 (10/10/2018) (the exchange rate on July 6, 2018, was 3.93 reais; Fig 2). The average monthly  
242 prices were slightly higher in July and August than in other months. They fluctuated most  
243 strongly in July and October (Figs 3a and b). The average exchange rate for 2018 was  
244 US\$1.00=R\$3.65) ([https://www.exchangerates.org.uk/USD-BRL-spot-exchange-rates-history-](https://www.exchangerates.org.uk/USD-BRL-spot-exchange-rates-history-2018.html)  
245 [2018.html](https://www.exchangerates.org.uk/USD-BRL-spot-exchange-rates-history-2018.html)).

246 **Fig 3a. Daily Average Prices (in Brazilian Reais) per 1 kg of Comb Grouper, in**  
247 **Copacabana (2018, US\$1.00=R\$3.65).**

248

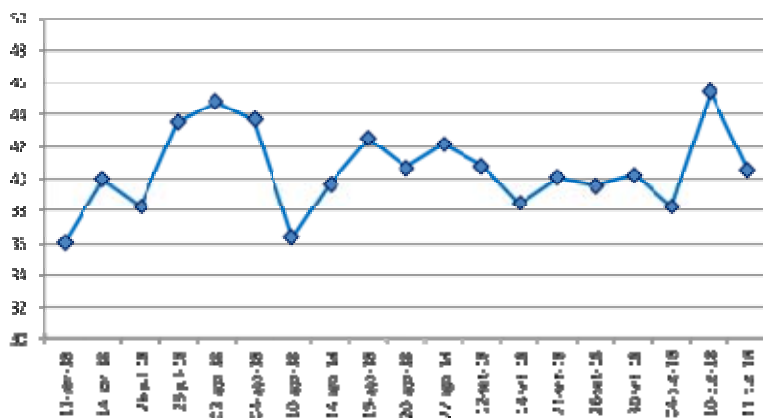

249

250

251 **Fig 3b. Monthly Average Prices (in Brazilian Reais) per 1 kg of Comb Grouper, in**  
252 **Copacabana (2018, US\$1.00=R\$3.65).**

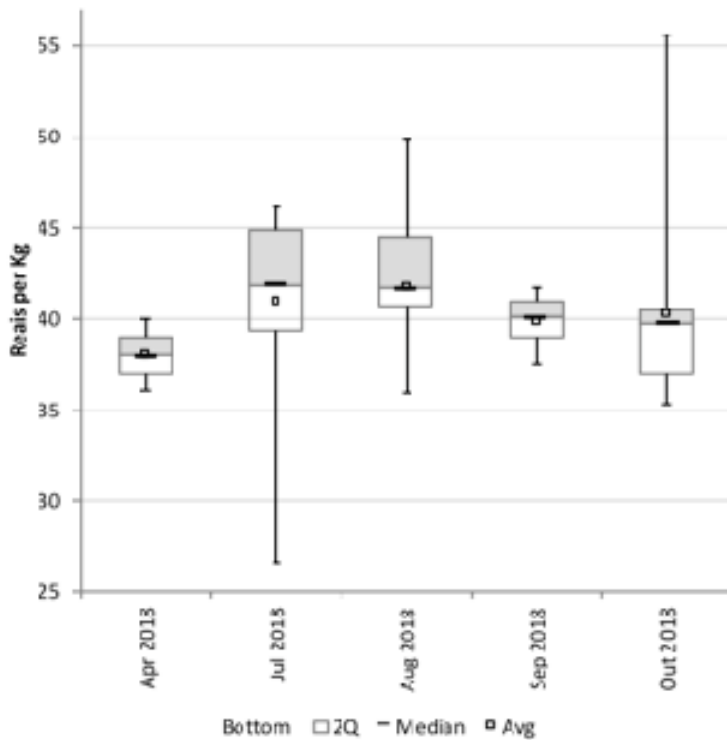

253

254

255 When comparing the yield (weight) of both species over the years, we observed higher

256

catches for dusky grouper, compared to comb grouper, along with a decrease in comb groupers

257

**Fig 4. Annual Catches by Weight of Dusky Grouper (A) and Comb grouper (B).** The results

258

from samples taken from September 2013 to February 2018 for and from September 2013-

259

December 2014 and January 2018- December 2019 for comb grouper at the Copacabana fishing

260

post.



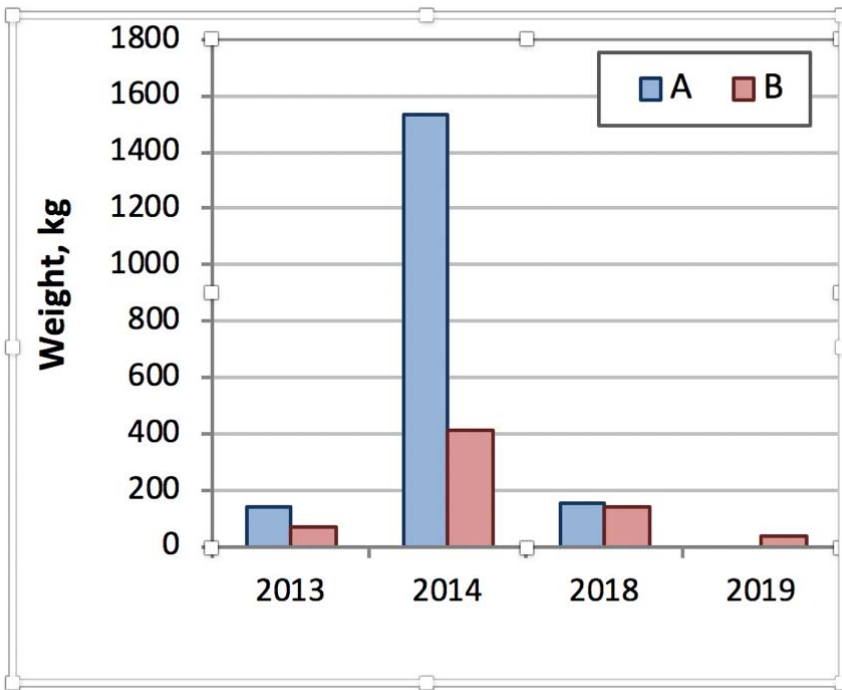

261

## 262 Genetics of groupers in the coast of Brazil

263 GBS libraries produced 150,458,819 raw reads for the 96 groupers, and 139,429,799

264 reads were retained following “process\_radtags” filtering. After applying the Stacks pipeline to

265 each genus and additional filtering, 1313 SNP loci were identified in 43 individuals of

266 *Mycteroperca* (*M. acutirostris* = 16, *M. bonaci* = 23 and *M. interstitialis* =4). For *Epinephelus*,

267 3528 SNP loci were identified in 45 individuals (*E. marginatus* = 27 and *E. morio* =18) (Figs A1

268 and A2, Appendix).

269 Outlier analyses identified 38 total consensus outlier loci in the three *Mycteroperca*

270 species. Population structure analyses were conducted using the remaining 1,275 SNPs that were

271 deemed to be neutrally evolving after outlier analyses. Overall,  $F_{ST}$  was 0.95 and highly

272 significant ( $p < .001$ ), while the species pairwise values varied from 0.935 to 0.967.

273           The high genetic divergence suggested by the pairwise  $F_{ST}$  estimates was also observed  
274 in the DAPCs. The analysis based on SNPs with neutral behavior explained almost 92% of the  
275 total variation in the first two components and clearly showed that samples of *M. acutirostris*, *M.*  
276 *bonaci* and *M. interstitialis* were highly distinct from each other (Fig 5). In Fig. 5, the DAPC  
277 scatter plot of *Mycteroperca acutirostris*, *M. bonaci*, and *M. interstitialis* that were collected in  
278 five Brazilian States (e.g., Rio de Janeiro, Bahia, Paraiba, Rio Grande do Norte), which were  
279 performed using 1,275 SNPs is shown.

280 **Fig 5. DAPC Plot of *Mycteroperca acutirostris*, *M. bonaci*, and *M. interstitialis*.** Individual  
281 *Mycteroperca* species are represented by colored symbols, and the PCA eigenvalues show that  
282 the first two principal components explain more than 91% of the genetic variability.

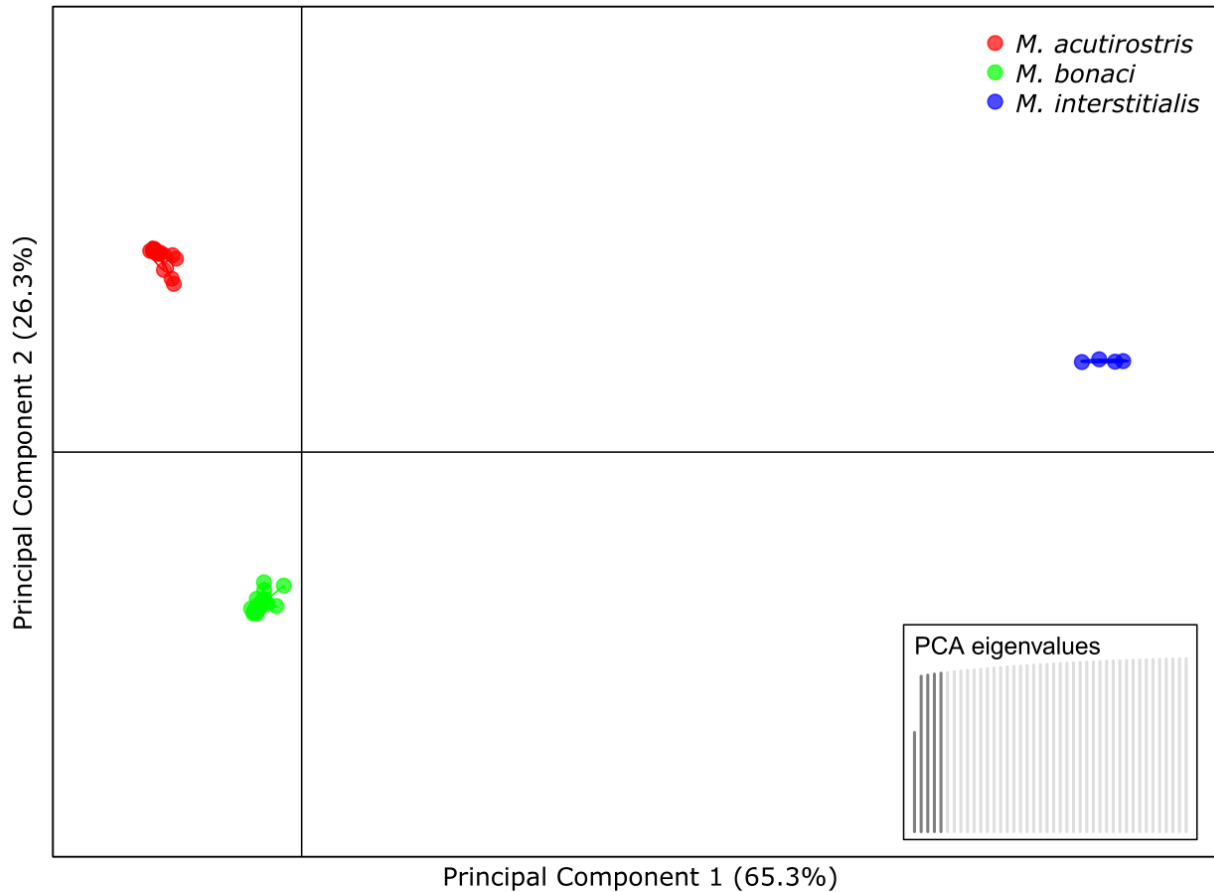

283

284

285

286

287

288

289

290

291

The same clustering patterns were observed for the neighbor-joining trees using both the neutral and outlier datasets (Fig A1 Appendix), although individuals of *M. interstitialis* appeared to be less divergent to those of *M. acutirostris* than to those of *M. bonaci*.

The genetic distances between the five grouper species (Fig 6) were determined from a set of neutral SNP loci and revealed that *M. acutirostris* is more closely related to *M. interstitialis* (0.343) than to *M. bonaci* (0.48). *Epinephelus morio* was the species that was most distant from the others, except for another species from the same genus (*E. marginatus*) (Fig 6). In Fig. 6 neighbor-joining trees based on Nei's genetic distances were produced using the set of

292 817 SNP loci identified with Stacks pipeline considering all the five Grouper species  
293 simultaneously.

294 **Fig 6. Neighbor-joining trees based on Nei's genetic distances.** Branch nodes are denoted as  
295 the percentage of bootstrap support that was generated with 1,000 replicates.

296

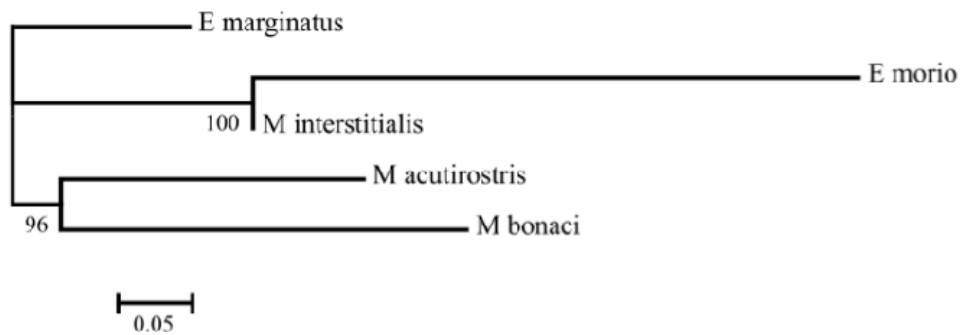

297

298

## 299 **Concluding remarks**

300 Exploratory research is very important for species that require management, especially  
301 species that are important for human consumption and for the livelihoods of poor communities  
302 that depend on small-scale fisheries for consumption and cash. This study provides important  
303 information for the conservation of this species and provides information on the reproduction  
304 period and on genetics that may be useful for managing this species. In addition, it provides  
305 alerts for a species that is becoming scarce and for a species with poor data and that is still  
306 considered of LC (least concern).

307 In this study, we found different catch patterns for each of the grouper species, namely,  
308 stability of catches and prices for dusky grouper, and a decreasing pattern for comb grouper, for

309 the Copacabana small-scale fishery. We added genetics to better understand the species and to  
310 gain insights into their conservation and biology. With this study, we hope to fill some gaps in  
311 Brazil and contribute to management efforts.

312  
313 By comparing catches of dusky grouper and comb grouper, contrasting patterns are found  
314 in the catches of the studied groupers: while we found relative stability for the catches of dusky  
315 grouper, we found very irregular and decreasing catches in terms of number and weight for comb  
316 groupers. Even considering that comb grouper is of LC (least concern, IUCN Red List), there is  
317 an information gap concerning its diet and reproduction [11]. Thus, an optimistic prognosis is  
318 offered from the studies of dusky grouper and Copacabana [16], but there is a pessimistic  
319 prognosis for comb grouper due to its decreasing catches when the fishing effort is maintained at  
320 a constant level, as was observed for the Copacabana fishery.

321 The results for the genetics of groupers reveal that *E. morio* shows the greatest genetic  
322 distance from *Epinephelus*; however, the *Mycteroperca* subfamily has a relatively short genetic  
323 distance.

324 How could these data aid in the conservation of species? Such information can help  
325 directly and indirectly.

326 Directly, information regarding the reproduction period is helpful for managing fish  
327 resources, as fishing closures for comb grouper in the spring could help maintain stocks.

328 Information on diet, in addition to its importance in maintaining available prey, could provide  
329 insights for possible aquaculture, which exists in SE Brazil for dusky grouper [29,30].

330 Indirectly, grouper genetics provides basic information for aquaculture; it engenders  
331 information that could aid in conservation by finding bottlenecks at some points, as was found  
332 for dusky grouper [31]. Here, genetic information could also be helpful for taxonomic analysis of  
333 the subfamily *Epinephelus*. Grouper systematics has been reevaluated, restricting the genus  
334 *Epinephelus* and expanding *Mycteroperca* when several species of *Epinephelus* were included in  
335 *Mycteroperca*, including *E. marginatus* [7,32].

336

### 337 **Acknowledgments**

338 We are grateful to the fishers Antonio, Elenilson (“Jaguriçá”) and Raul; Ana helped with data  
339 from the Marimbás Club, Copacabana. AA-P thanks FAPESP (# 2018/00036-9) for a post-  
340 doctoral scholarship. AB is grateful to the productivity scholarship from CNPq (# 301592/2017-  
341 9), for the grant FAPESP # 14/16939-7, and for IDRC/UNICAMP grant (2019-2014). AA-P  
342 thanks FAPESP (# 2018/00036-9) for a post-doctoral scholarship. We are very grateful to Alline  
343 A. L. Tribst for the support in the laboratory, at Nepa/Unicamp, in the material extraction of the  
344 fish.

345

346

### 347 **Compliance with ethical standards**

348            This research was approved and signed by B. R. Martins dos Santos, Comitê de Ética,  
349    Universidade Santa Cecília, number 1.747.889 on September 27, 2016 (Plataforma Brasil). It is  
350    approved under number 53824 at the SISBIO and is registered under number AB53669 at the  
351    SISGEN, MMA (Ministério do Meio Ambiente, Brasil).  
352

## 353 **References**

- 354 1. Béné C. Small-scale fisheries: Assessing their contribution to rural livelihoods in  
355 developing countries. *FAO Fish Circ.* 2006;1008: 46.
- 356 2. Begossi A, Salivonchyk S, Hallwass G, Hanazaki N, Lopes PFM, Silvano RAM.  
357 Threatened fish and fishers along the Brazilian Atlantic Forest Coast. *Ambio.* 2017;46:  
358 907-914.
- 359 3. Kalidin BK, Mattone C, Sheaves M. Barriers to effective monitoring and evaluation of  
360 small-scale fisheries in small island developing states: An example from Mauritius. *Mar*  
361 *Policy.* 2020;118: 103845.
- 362 4. Lopes P, Verba J, Begossi A, Pennino M. Predicting species distribution from fishers'  
363 local ecological knowledge: An alternative for data-poor management. *Can J Fish Aquat*  
364 *Sci.* 2018;76: 1423-1431.
- 365 5. Fearnside PM. Hidrelétricas na Amazônia Brasileira: Questões ambientais e sociais.  
366 *Hidrelétricas Amazôn.* 2019;7: 37-82.
- 367 6. Salas S, Barragán-Paladines MJ, Chuenpagdee R. Viability and sustainability of small-  
368 scale fisheries in Latin America and the Caribbean. Cham, Switzerland: Springer  
369 International Publishing; 2018.
- 370 7. Craig TM, de Mitcheson YJS, Heemstra PC. Groupers of the world: A field and market  
371 guide. Grahamstown, South Africa: CRC Press; 2011.



- 372 8. Figueiredo JL, Menezes, N. A. 1980. Manual de peixes marinhos do sudeste do Brasil.  
373 São Paulo, Brazil: Museu de Zoologia, Universidade de São Paulo; 1980.
- 374 9. Silvano RAM, MacCord PFL, Lima RV, Begossi A. When does this fish spawn?  
375 Fishermen's local knowledge of migration and reproduction of Brazilian coastal fishes.  
376 Environ Biol Fishes. 2006;76: 371-386.
- 377 10. Andreoli TB, Ramires M, Clauzet M, Begossi A. Comb grouper (*Mycteroperca*  
378 *acutirostris*) information from catches at Copacabana, Rio de Janeiro, Brazil. J Marine  
379 Sci Res Dev. 2016;6: 200.
- 380 11. Froese, R. and D. Pauly. Editors. FishBase. World Wide Web electronic publication.  
381 [www.fishbase.org](http://www.fishbase.org), version (12/2020).
- 382 12. IUCN. 2020. <https://www.iucnredlist.org/species/132830/46918685>. Comb grouper,  
383 February, 18, 2021, 08:46.
- 384 13. Trindade-Santos I, Freire, K.M.F. 2015. Analysis of reproductive patterns of  
385 fishes from three Large Marine Ecosystems. Front Mar Sc. 2015; 2:38.
- 386 14. IUCN. 2020.  
387 [https://www.iucnredlist.org/search?query=Mycteroperca%20bonaci&searchType=specie](https://www.iucnredlist.org/search?query=Mycteroperca%20bonaci&searchType=species)  
388 [s](https://www.iucnredlist.org/search?query=Mycteroperca%20bonaci&searchType=species). Black grouper, February 18, 2021,11:42.
- 389 15. Begossi A, Silvano RA. Ecology and ethnoecology of dusky grouper [garoupa,  
390 *Epinephelus marginatus* (Lowe, 1834)] along the coast of Brazil. J Ethnobiol Ethnomed.  
391 2008;4: 20-20.

- 392 16. Begossi A, Salivonchyk S. Integrating science and citizen science: The dusky Grouper  
393 (*Epinephelus marginatus*) sustainable fishery of Copacabana, Rio de Janeiro, Brazil.  
394 bioRxiv preprint. 2019. doi: 10.1101/759357.
- 395 17. Begossi A, Salivonchyk S, Silvano RAM. Collaborative research on dusky grouper  
396 (*Epinephelus marginatus*): Catches from the small-scale fishery of Copacabana Beach,  
397 Rio De Janeiro, Brazil. *J Coast Zone Manag.* 2016;19: 1-6.
- 398 18. Begossi A, Salyvonchyk S, Glamuzina B, de Souza SP, Lopes PFM, Priolli RHG, et al.  
399 Fishers and groupers (*Epinephelus marginatus* and *E. morio*) in the coast of Brazil:  
400 Integrating information for conservation. *J Ethnobiol Ethnomed.* 2019;15: 53-53.
- 401 19. Begossi A, Camargo E, Carpi S. Os mapas da pesca artesanal - pesqueiros e pescadores  
402 na costa do Brasil. Sao Carlos, Brazil: RiMa; 2013.
- 403 20. Begossi A. Local knowledge and training towards management. *Environ Dev Sustain.*  
404 2008;10: 591-603.
- 405 21. Begossi A, Salivonchyk SS, Barreto T, Nora V, Silvano RAM. Small-scale Fisheries and  
406 Conservation of Dusky Grouper (*Garoupa*), *Epinephelus marginatus* (Lowe, 1834) in the  
407 Southeastern Brazilian Coast. *Sci J Agric Res Manag.* 2012; Article ID sjarm-174.
- 408 22. Poland JA, Brown PJ, Sorrells ME, Jannink JL. Development of high-density genetic  
409 maps for barley and wheat using a novel two-enzyme genotyping-by-sequencing  
410 approach. *PLoS One.* 2012;7: e32253.
- 411 23. Catchen J, Hohenlohe PA, Bassham S, Amores A, Cresko WA. Stacks: An analysis tool  
412 set for population genomics. *Mol Ecol.* 2013;22: 3124-3140.

- 413 24. Luu K, Bazin E, Blum MG. pcadapt: An R package to perform genome scans for  
414 selection based on principal component analysis. *Mol Ecol Resour.* 2017;17: 67-77.
- 415 25. Flanagan SP, Jones AG. Constraints on the FST-heterozygosity outlier approach. *J*  
416 *Hered.* 2017;108: 561-573.
- 417 26. Vitalis R, Gautier M, Dawson KJ, Beaumont MA. Detecting and measuring selection  
418 from gene frequency data. *Genetics.* 2014;196: 799-817.
- 419 27. Jombart T. adegenet: A R package for the multivariate analysis of genetic markers.  
420 *Bioinformatics.* 2008;24: 1403-1405.
- 421 28. Begossi A, Lopes PF. Garoupas e pescadores. São Carlos, Brazil: Editora Rima; 2020.
- 422 29. Glamuzina B. Groupers fishery and aquaculture in the Mediterranean. In: Begossi A,  
423 Lopes PFM, editors. Garoupas e pescadores (Groupers and fishers). São Carlos, Brazil:  
424 Núcleo de Estudos e Pesquisas da Alimentação, Universidade Estadual de Campinas/Ed.  
425 Rima; 2020. pp. 98-103.
- 426 30. Kerber C. Avanços recentes de cultivo de garoupas no Brazil. In: Begossi A, Lopes PFM,  
427 editors. Garoupas e pescadores (Groupers and fishers). São Carlos, Brazil: Núcleo de  
428 Estudos e Pesquisas da Alimentação, Universidade Estadual de Campinas/Ed. Rima;  
429 2020. pp. 89-97.
- 430 31. Priolli RHG, Stabellini NS, Bajay MM. Diversidade genética de uma espécie em perigo  
431 de extinção: A garoupa *Epinephelus marginatus*. In: Begossi A, Lopes PFM, editors.

- 432 Comunidades pesqueiras de Paraty – sugestões para manejo. São Carlos, Brazil: Ed.  
433 Rima; 2014. pp. 27-40.
- 434 32. Ma KY, Craig MT. An inconvenient monophyly: An update on the taxonomy of the  
435 groupers (Epinephelidae). *Copeia*. 2018;106: 443-456.
- 436

437 **Appendix**

438 **Fig A1. Neighbor-joining Trees Based on Nei's Genetic Distances using the Following Sets**  
439 **of Loci:** (A) a panel of 1,275 putatively neutral SNPs and (B) a panel of 38 putatively adaptive  
440 SNPs. Branch nodes are denoted as the percentage of bootstrap support that was generated with  
441 1,000 replicates. Collection codes correspond to *M. acutirostis* (red dots), *M. bonaci* (green) and  
442 *M. interstitialis* (blue).

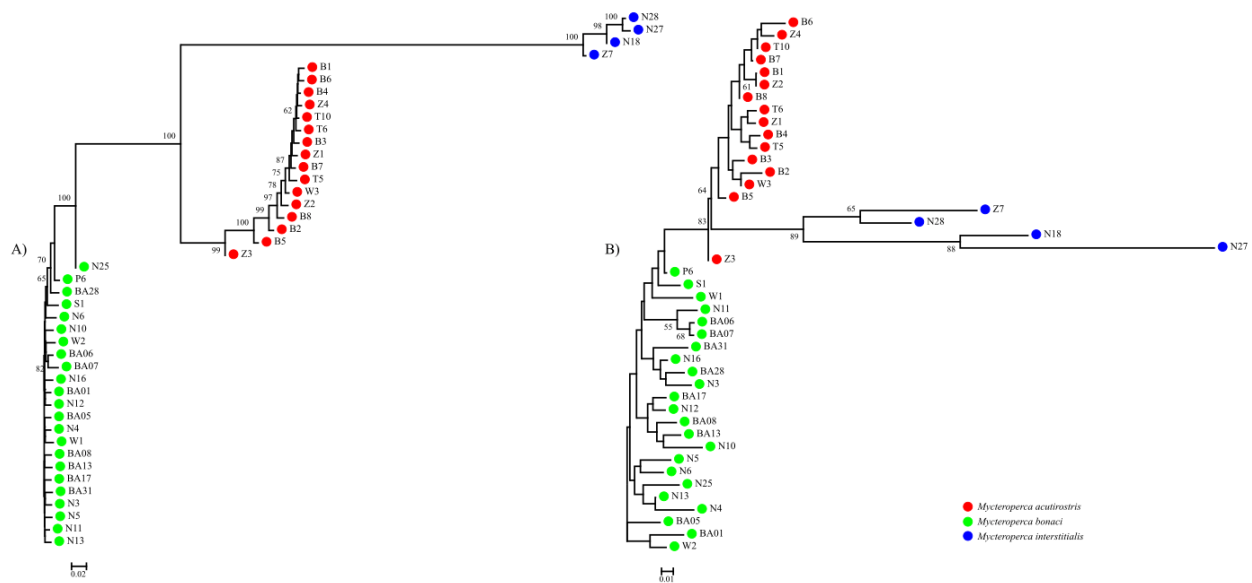

443  
444 **Fig A2. Neighbor-joining Trees Based on Nei's Genetic Distances Using the Following Sets**  
445 **of Loci:** (A) a panel of 3,490 putatively neutral SNPs and (B) a panel of 38 putatively adaptive  
446 SNPs. Branch nodes are denoted as the percentage of bootstrap support that was generated with  
447 1,000 replicates. Collection codes correspond to *E. marginatus* (red dots) and *E. morio* (blue).

448  
449  
450

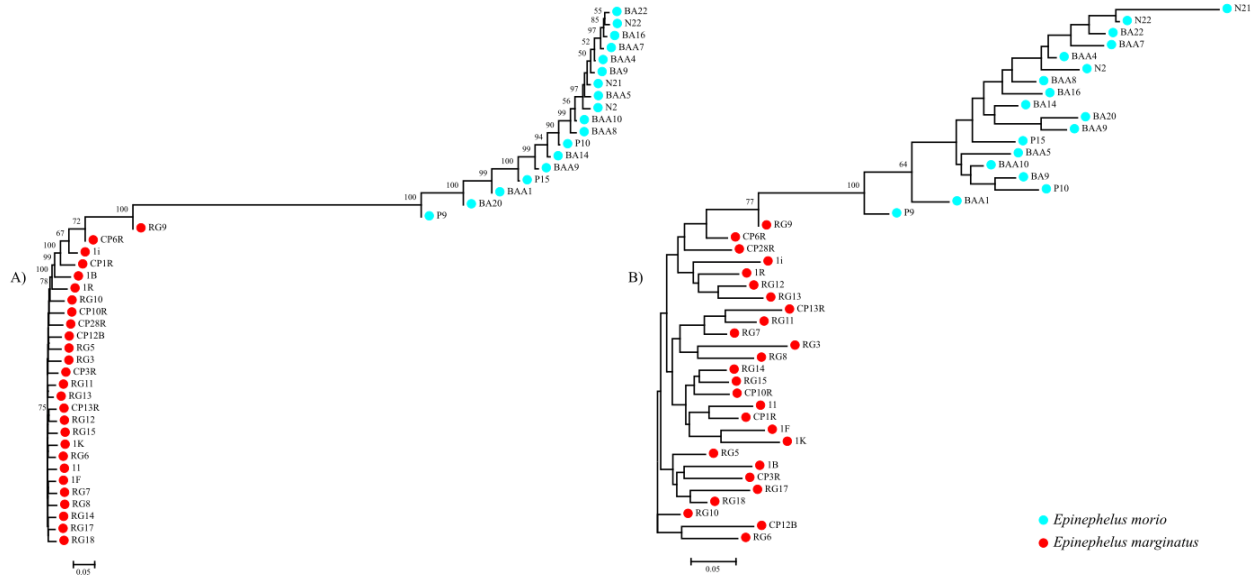

451

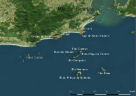

# Map of the Bay

Point A

Point B

Point C

Point D

Point E

Point F

Point G

Point H

Point I

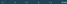

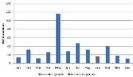



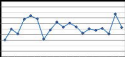

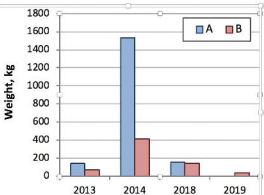

Principal Component 2 (26.3%)

- *M. acutirostris*
- *M. bonaci*
- *M. interstitialis*

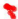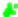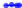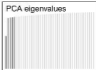

Principal Component 1 (65.3%)

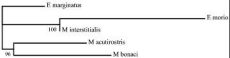

0.05
